# Supplementary material for: Age-related metabolic and neurodegenerative changes in SAMP8 mice
Source: Aging (Albany NY). 2022 Sep 16;14(18):7300–27. doi: 10.18632/aging.204284 (PMC9550245; doi:10.18632/aging.204284)
Supplement: Supplementary Figures [file aging-14-204284-s001.pdf]

## SUPPLEMENTARY FIGURES

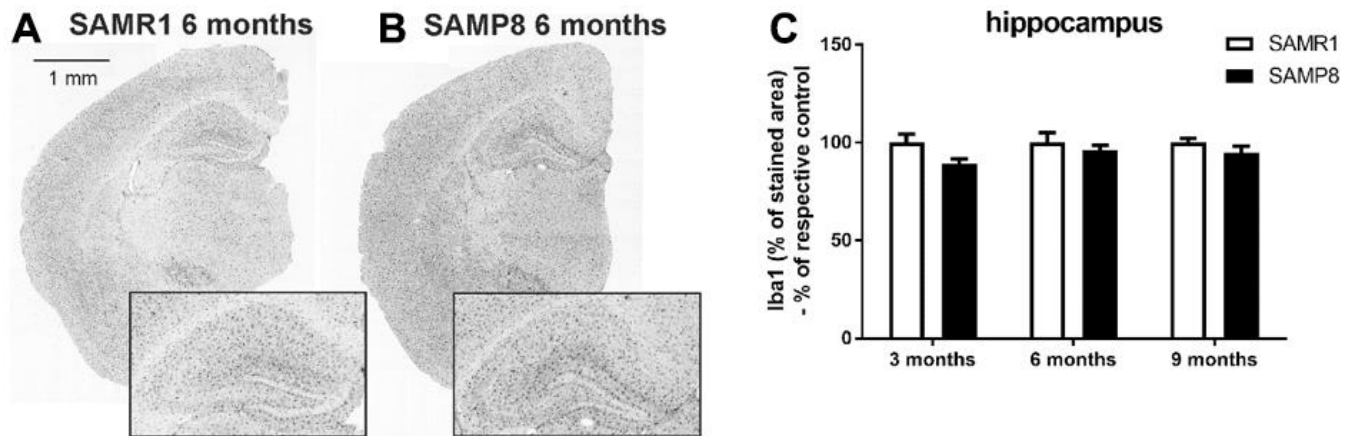

**Supplementary Figure 1.** No significant changes in the hippocampal microgliosis immunohistochemically stained with Iba1: (A, B) representative photomicrographs of the brains of 6-months-old mice, and (C) the quantification. Black-framed inserts in right down corners show a magnified area of hippocampus. Percentage of the stained area expressed as a % of a respective control group was used. Data are mean  $\pm$  SEM, analyzed by t-test. No significant difference was found.  $n = 4-5$  mice per group, 8-10 sections per brain.

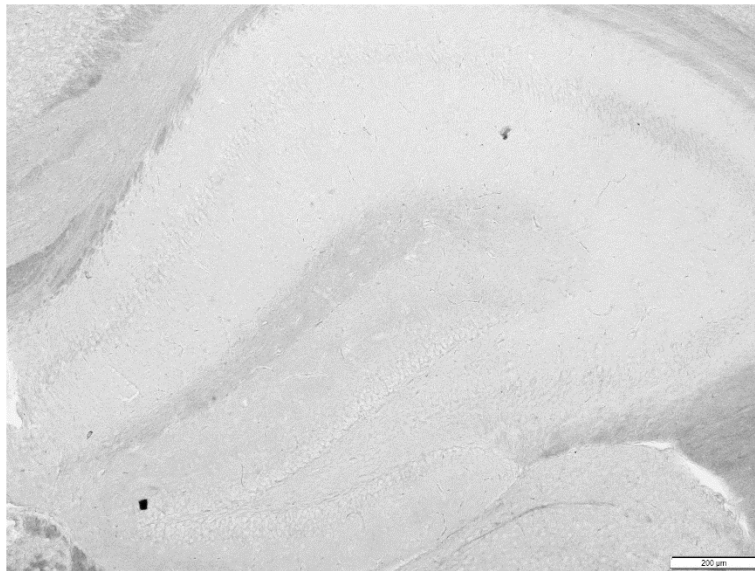

**Supplementary Figure 2.** No sign of  $\beta$ -amyloid pathology, using immunohistochemical staining of SAMP8 hippocampi at the age of 6 months with rabbit anti- $\beta$ -amyloid antibody (Invitrogen 71-5800).  $n = 4-5$  mice per group, 8-10 sections per brain.

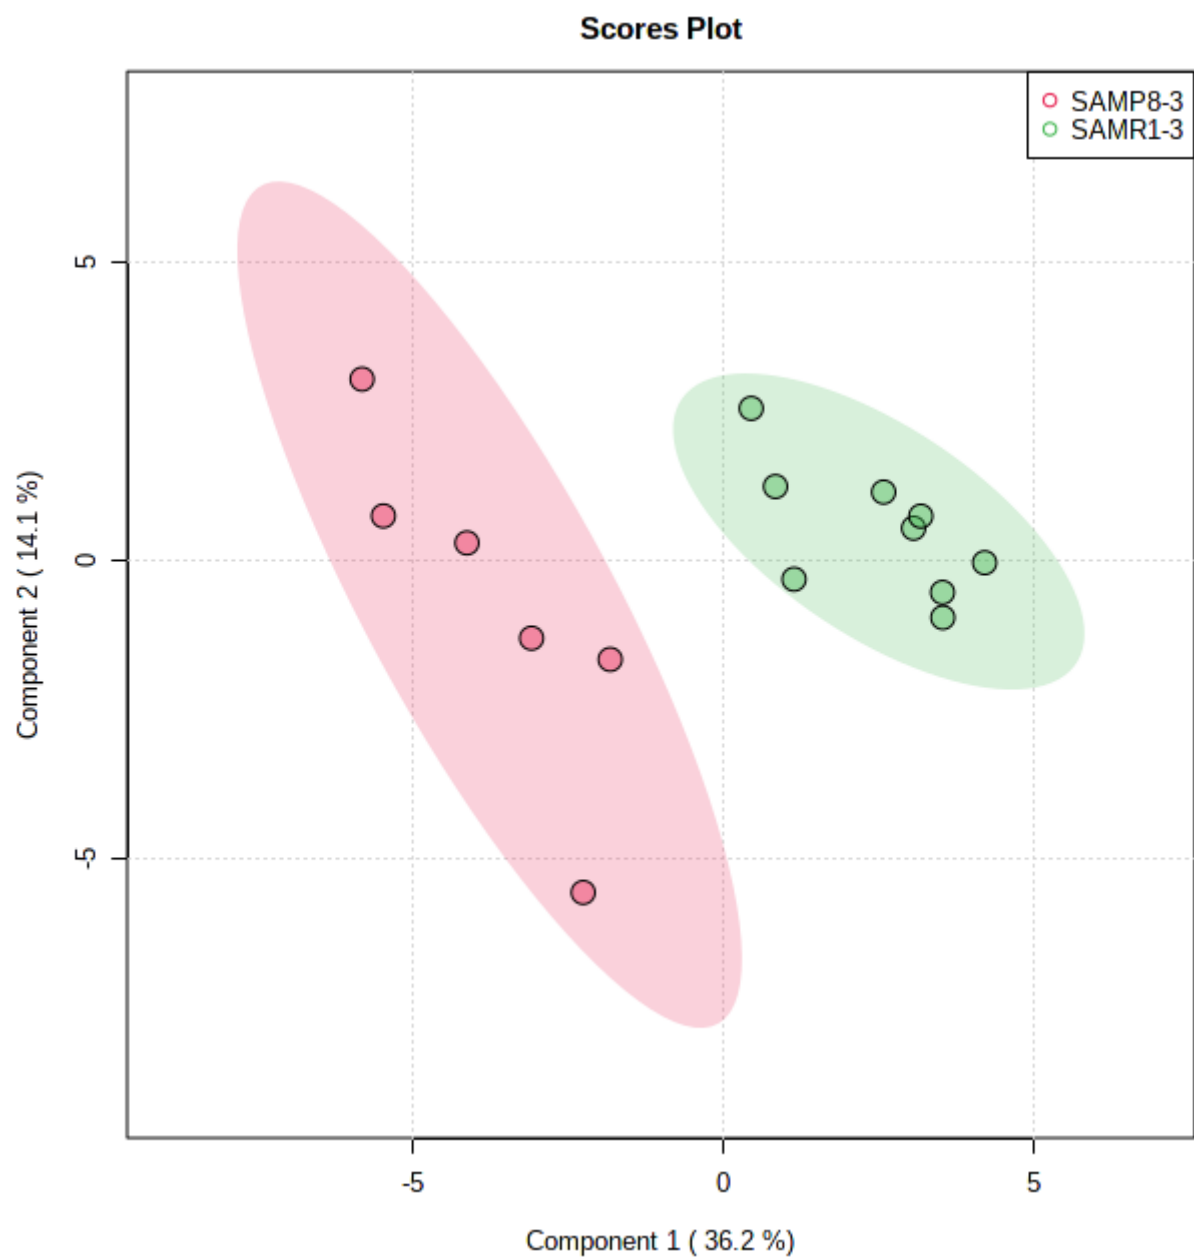

**Supplementary Figure 3. PLS-DA model displayed group separation without any outlier; scores plot.** The results of leave-one-out cross validation: number of components: 2, accuracy: 1.00,  $R^2=0.93$ ,  $Q^2=0.82$ , p value of permutation test with 2000 repetitions = 0.106; color coding: SAMP8 (n = 6) in red, SAMR1 (n = 9) in green.
